# Supplementary material for: Semi-Empirical Model for Henry’s Law Constant of Noble Gases in Molten Salts
Source: Research Square preprint supplement (doi:10.21203/rs.3.rs-3352622/v1), 2023-09-26
Supplement: Supplementary file 1 [file 443b11be0f18964d7d6ffac2.xlsx]

## Sheet: Sheet1
		Helium (Watson)			Helium (Malinauskas)
	Temp C	Temperature K	k_H (Henry's gas)	std	Temperature K	k_H (Henry's gas)	std
	500	773.15	7.49e-08	7e-10	773.15	6.08e-08	3.9e-09
	600	873.15	1.155e-07	3.9e-09	873.15	8.38e-08	1.5e-09
	700	973.15	1.493e-07	4.2e-09	973.15	1.147e-07	2.3e-09
	800	1073.15	1.948e-07	1e-10	1073.15	1.647e-07	2.5e-09
		Neon (Watson)
	Temp C	Temperature K	k_H (Henry's gas)	std
	500	773.15	3.09e-08	9e-10
	600	873.15	4.63e-08	1e-10
	700	973.15	6.8e-08	9e-10
	800	1073.15	9.01e-08	1.5e-09
		Argon (Watson)
	Temp C	Temperature K	k_H (Henry's gas)	std
	500	773.15	5.4e-09	2e-10
	600	873.15	9.8e-09	2e-10
	700	973.15	1.69e-08	1e-09
	800	1073.15	2.66e-08	1.5e-09
		xenon (Watson)
	Temp C	Temperature K	k_H (Henry's gas)	std
	600	873.15	2.33e-09	4e-11
	650	923.15	3.33e-09	1.5e-10
	700	973.15	5.05e-09	2e-10
	800	1073.15	8.63e-09	2e-10
		Watson, G. M., Evans III, R. B., Grimes, W. R., & Smith, N. V. (1962). Solubility of Noble Gases in Molten Fluorides. In LiF-BeF2. Journal of Chemical and Engineering Data, 7(2), 285-287.
		Malinauskas, A. P., Richardson, D. M., Savolainen, J. E., & Shaffer, J. H. (1972). Apparatus for the Determination of the Solubility of Hydrogen in Molten Salts. Industrial & Engineering Chemistry Fundamentals, 11(4), 584-586.
		Malinauskas, A. P., & Richardson, D. M. (1974). The solubilities of hydrogen, deuterium, and helium in molten Li2BeF4. Industrial & Engineering Chemistry Fundamentals, 13(3), 242-245.
